# Supplementary material for: Within-colony genetic diversity differentially affects foraging, nest maintenance, and aggression in two species of harvester ants
Source: PubMed Central journal article supplement (PMC6138738; doi:10.1038/s41598-018-32064-3), 2018-09-14
Supplement: 41598_2018_32064_MOESM1_ESM.pdf [file 41598_2018_32064_MOESM1_ESM.pdf]

Supplementary Material for the manuscript

**Within-colony genetic diversity differentially affects foraging, nest maintenance, and aggression in two species of harvester ants**

MAYA SAAR, PIERRE-ANDRÉ EYER, TAL KILON-KALLNER, ABRAHAM HEFETZ & INON SCHARF

The Supplementary Material consists of five tables, a short description of the molecular analysis conducted, and four figures.

**Table S1:** Characters for recognizing and distinguishing between *Messor arenarius* and *Messor* sp.:

| <b>Character</b>                           | <b><i>Messor arenarius</i></b>                                                                                                              | <b><i>Messor</i> sp.</b>                                                                                                                                                            |
|--------------------------------------------|---------------------------------------------------------------------------------------------------------------------------------------------|-------------------------------------------------------------------------------------------------------------------------------------------------------------------------------------|
| Max. total length (TL)                     | 16 mm                                                                                                                                       | 8.3 mm                                                                                                                                                                              |
| Funiculus segments                         | 1 <sup>st</sup> segment slightly longer and wider than 2 <sup>nd</sup>                                                                      | 1 <sup>st</sup> segment distinctly longer and wider than the 2 <sup>nd</sup> , somewhat flattened dorso-ventrally                                                                   |
| Propodeum                                  | posteriorly armed, with acute spine                                                                                                         | unarmed, posteriorly angular                                                                                                                                                        |
| Petiole node                               | truncated, anterior and truncated surfaces meet at right to obtuse angle.(in small specimens, occasionally rounded dorsally)                | never truncated, anterior and posterior surfaces meet at sharp, acute angle (< 45°)                                                                                                 |
| Colouration and texture                    | head dorsum matte, strongly striate punctuate, anterior surface of petiole and of postpetiole, and gastertergites matte, densely punctuated | head, anterior surface of petiole and postpetiole, and gaster shiny; head finely striate longitudinally with sparse points; in largest specimens occiput with transversal striation |
| Setation of 1 <sup>st</sup> gaster segment | numerous (> 80) uniformly distributed, long, decumbent to erect setae; setae length up to 0.35–0.40 mm                                      | few (< 40), short setae concentrated on antero-dorsal surface of tergite; distinctly shorter (< 0.15 mm) than row of setae on posterior margin of tergite (0.20–0.25 mm)            |

**Table S2:** The foraging and nest maintenance data, obtained in two consecutive days (9 and 18 colonies of *M. sp.* and *M. arenarius* respectively). The mean of data obtained in the two days was tested in correlation with the genetic relatedness (queller index). The molecular analysis data is also presented (9 and 15 colonies of *M. sp.* and *M. arenarius* respectively):

| Species / Colony ID            | D1 mean seed taken | D2 mean seed taken | Seed taken (mean D1, 2) | Dist from Het colony (m) | Dist from Con colony (m) | D1 tp place | D1 tp rem | D2 tp place | D2 tp rem | D1 prop | D2 prop | Prop (mean D1, D2) | No. Worker genotyped | Queller index | Patriline no. |
|--------------------------------|--------------------|--------------------|-------------------------|--------------------------|--------------------------|-------------|-----------|-------------|-----------|---------|---------|--------------------|----------------------|---------------|---------------|
| <b><i>Messor sp.</i></b>       |                    |                    |                         |                          |                          |             |           |             |           |         |         |                    |                      |               |               |
| 2                              | 0.05               | 0.13               | 0.09                    | 7.50                     | 4.60                     | 33          | 2         | 28          | 0         | 0.06    | 0.00    | 0.03               | 11                   | 0.07          |               |
| 3                              | 0.01               | 0.01               | 0.01                    | 29.40                    |                          | 5           | 0         | 5           | 0         | 0.00    | 0.00    | 0.00               | 9                    | 0.32          |               |
| 5                              | 0.02               | 0.02               | 0.02                    | 28                       | 50.50                    | 5           | 0         | 6           | 0         | 0.00    | 0.00    | 0.00               | 12                   | 0.18          |               |
| 6                              | 0.06               | 1.00               | 0.53                    | 14.40                    | 30.30                    | 15          | 0         |             |           | 0.00    |         | 0.00               | 8                    | 0.45          |               |
| 7                              | 0.20               | 1.02               | 0.61                    | 27.70                    | 58                       | 16          | 7         | 21          | 10        | 0.44    | 0.48    | 0.46               | 12                   | 0.22          |               |
| 8                              | 0.26               | 0.83               | 0.55                    | 34.70                    | 50.10                    | 8           | 0         | 8           | 1         | 0.00    | 0.13    | 0.06               | 12                   | 0.33          |               |
| 14                             | 0.14               | 0.79               | 0.47                    | 55                       | 58                       | 25          | 0         | 16          | 3         | 0.00    | 0.19    | 0.09               | 12                   | 0.13          |               |
| 40                             | 0.02               | 0.02               | 0.02                    | 46.10                    | 1.60                     | 9           | 2         | 9           | 2         | 0.22    | 0.22    | 0.22               | 12                   | 0.15          |               |
| 847                            | 0.58               | 0.05               | 0.32                    | 18.20                    | 50.10                    | 6           | 0         | 6           | 3         | 0.00    | 0.50    | 0.25               | 15                   | 0.19          |               |
| <b><i>Messor arenarius</i></b> |                    |                    |                         |                          |                          |             |           |             |           |         |         |                    |                      |               |               |
| 6                              | 0.68               | 0.86               | 0.77                    | 28.50                    | 80.50                    | 14          | 4         | 14          | 2         | 0.29    | 0.14    | 0.21               | 12                   | 0.31          | 3             |
| 18                             | 2.01               |                    | 2.01                    |                          |                          | 18          | 6         | 17          | 16        | 0.33    | 0.94    | 0.64               |                      |               |               |
| 19                             | 0.31               |                    | 0.31                    |                          |                          | 12          | 11        | 12          | 9         | 0.92    | 0.75    | 0.83               |                      |               |               |
| 20                             | 0.13               |                    | 0.13                    |                          |                          | 8           | 3         | 8           | 4         | 0.38    | 0.50    | 0.44               |                      |               |               |

|     |      |      |      |       |       |    |   |    |    |      |      |      |    |      |   |
|-----|------|------|------|-------|-------|----|---|----|----|------|------|------|----|------|---|
| 21  | 0.97 | 0.29 | 0.63 | 9.30  | 38    | 10 | 2 | 10 | 0  | 0.20 | 0.00 | 0.10 | 12 | 0.89 | 1 |
| 22  | 0.03 | 0.02 | 0.02 |       |       | 12 | 0 | 12 | 3  | 0.00 | 0.25 | 0.13 |    |      |   |
| 23  | 0.02 | 0.03 | 0.02 | 46.10 | 12    | 9  | 2 | 11 | 6  | 0.22 | 0.55 | 0.38 | 21 | 0.44 | 3 |
| 24  | 1.51 | 1.93 | 1.72 | 1.60  | 4.80  | 13 | 2 | 17 | 3  | 0.15 | 0.18 | 0.17 | 12 | 0.37 | 2 |
| 25  | 1.37 | 1.59 | 1.48 | 1.72  | 7.90  | 14 | 2 | 14 | 13 | 0.14 | 0.93 | 0.54 | 11 | 0.27 | 3 |
| 26  | 0.03 | 0.06 | 0.05 | 18.10 | 60    | 6  | 0 | 6  | 0  | 0.00 | 0.00 | 0.00 | 12 | 0.81 | 1 |
| 27  | 0.03 | 0.02 | 0.03 | 16.10 | 9.10  | 11 | 0 | 11 | 1  | 0.00 | 0.09 | 0.05 | 12 | 0.63 | 2 |
| 28  | 0.05 | 0.28 | 0.16 | 20.50 | 128   | 13 | 5 | 14 | 5  | 0.38 | 0.36 | 0.37 | 11 | 0.56 | 2 |
| 30  | 0.73 | 0.76 | 0.74 |       |       | 12 | 5 | 12 | 2  | 0.42 | 0.17 | 0.29 | 12 | 0.48 | 1 |
| 31  | 0.94 | 1.81 | 1.38 | 115   | 112   | 16 | 5 | 16 | 4  | 0.31 | 0.25 | 0.28 | 12 | 0.18 | 3 |
| 33  | 0.63 | 1.85 | 1.24 | 9     | 14.40 | 11 | 5 | 11 | 4  | 0.45 | 0.36 | 0.41 | 12 | 0.28 | 3 |
| 34  |      |      |      |       |       |    |   |    |    |      |      |      | 11 |      | 1 |
| 210 | 0.05 | 0.03 | 0.04 |       |       | 9  | 2 | 12 | 3  | 0.22 | 0.25 | 0.24 | 12 | 0.67 | 1 |
| 852 | 0.03 | 0.19 | 0.11 | 2.10  | 80.50 | 9  | 1 | 9  | 1  | 0.11 | 0.11 | 0.11 | 11 | 0.70 | 2 |
| 861 | 0.06 | 0.15 | 0.11 | 12.70 | 28.40 | 10 | 0 | 10 | 0  | 0.00 | 0.00 | 0.00 | 10 | 0.56 | 2 |

**Abbreviations in headlines for Table S2:** D = Day, Dist = Distance, Het = heterospecific,

Con = conspecific, tp = toothpicks, place = placed, rem = removed, prop = proportion and

Queller index = Queller relatedness index.

**Table S3:** The aggression assay data for 9 and 12 colonies of *M. sp.* and *M. arenarius*, respectively. Specific aggression levels (towards conspecifics, or heterospecifics, or nestmates) were averaged per colony:

| Species /Colony ID             | No. workers in Con | Aggression Con (mean) | No. workers in Het | Aggression Het (mean) | No. workers in Nestmate | Aggression Nestmates (mean) | Sum of aggression |
|--------------------------------|--------------------|-----------------------|--------------------|-----------------------|-------------------------|-----------------------------|-------------------|
| <b><i>Messor sp.</i></b>       |                    |                       |                    |                       |                         |                             |                   |
| 2                              | 12                 | 2.49                  | 8                  | 3.88                  | 8                       | 0.00                        | 6.37              |
| 3                              |                    | 0.00                  | 9                  | 2.12                  | 7                       | 0.02                        | 2.14              |
| 5                              | 10                 | 0.13                  | 10                 | 2.54                  | 9                       | 0.33                        | 3.00              |
| 6                              | 5                  | 0.11                  | 5                  | 0.71                  | 5                       | 0.04                        | 0.86              |
| 7                              | 12                 | 0.65                  | 12                 | 5.09                  | 8                       | 0.00                        | 5.74              |
| 8                              | 12                 | 0.69                  | 6                  | 2.11                  | 8                       | 0.61                        | 3.41              |
| 14                             | 12                 | 0.36                  | 12                 | 5.98                  | 8                       | 0.00                        | 6.34              |
| 40                             | 10                 | 0.71                  | 11                 | 2.91                  | 8                       | 0.16                        | 3.78              |
| 847                            | 11                 | 0.32                  | 11                 | 2.62                  | 8                       | 0.51                        | 3.45              |
| <b><i>Messor arenarius</i></b> |                    |                       |                    |                       |                         |                             |                   |
| 6                              | 5                  | 0.17                  | 11                 | 2.55                  | 8                       | 0.24                        | 2.96              |
| 18                             |                    |                       |                    |                       |                         |                             |                   |
| 19                             |                    |                       |                    |                       |                         |                             |                   |

|     |    |      |    |      |   |      |      |
|-----|----|------|----|------|---|------|------|
| 20  |    |      |    |      |   |      |      |
| 21  | 12 | 0.78 | 11 | 4.47 | 6 | 0.21 | 5.46 |
| 22  |    |      |    |      |   |      |      |
| 23  | 0  | 0.00 | 11 | 1.53 | 8 | 0.06 | 1.60 |
| 24  | 12 | 0.47 | 8  | 1.56 | 3 | 0.01 | 2.03 |
| 25  | 6  | 0.48 | 6  | 1.44 | 4 | 0.09 | 2.01 |
| 26  | 8  | 0.13 | 4  | 4.24 | 5 | 0.00 | 4.37 |
| 27  | 6  | 0.31 | 6  | 1.10 | 4 | 0.00 | 1.41 |
| 28  | 12 | 0.69 | 12 | 2.84 | 8 | 0.01 | 3.55 |
| 30  |    |      |    |      |   |      |      |
| 31  | 12 | 0.75 | 12 | 3.98 | 8 | 0.10 | 4.82 |
| 33  |    |      |    |      |   |      |      |
| 34  |    |      |    |      |   |      |      |
| 210 | 10 | 0.07 | 9  | 1.83 | 8 | 0.08 | 1.98 |
| 852 | 11 | 0.07 | 11 | 1.64 | 8 | 0.10 | 1.81 |
| 861 | 12 | 0.40 | 11 | 4.97 | 7 | 0.05 | 5.42 |

**Abbreviations in headlines for Table S3:** Het = heterospecific encounter,

Con = conspecific encounter and Nestmate = nestmates encounter.

**Table S4:** Newly-developed PCR conditions for the microsatellite markers to fit and amplify the alleles of the two studies *Messor* species:

| Species and markers        | Set name and volume | Annealing temperature (°C) |
|----------------------------|---------------------|----------------------------|
| <b><i>M.sp</i></b>         |                     |                            |
|                            | <b>Sp1</b>          | 62                         |
| Ms2D                       | 0.3 µl              |                            |
| Asen155                    | 0.4 µl              |                            |
|                            | <b>Sp2</b>          | 54                         |
| Asen15                     | 0.4 µl              |                            |
|                            | <b>Sp3</b>          | 52                         |
| Ms1F                       | 0.3µl               |                            |
| Ms1B                       | 0.6 µl              |                            |
| <b><i>M. arenarius</i></b> |                     |                            |
|                            | <b>arenarius1</b>   | 62                         |
| Ms2D                       | 0.3 µl              |                            |
| Asen155                    | 0.4 µl              |                            |
|                            | <b>arenarius2</b>   | 57                         |
| Ms1A                       | 0.3 µl              |                            |
| Ms2C                       | 0.5 µl              |                            |
| Ms1F                       | 0.5 µl              |                            |
|                            | <b>arenarius3</b>   | 52                         |
| Asen15                     | 0.3 µl              |                            |

**Table S5:** The genotyping data of 9 and 15 colonies of *M. sp.* and *M. arenarius*, respectively. Individuals (for instance, on the first row; Msp847w1) are labeled as follows: species, colony ID and the worker number. For each individual, the number of basepairs is indicated for the two alleles of every microsatellite marker analyzed:

| <b>Species</b>           | <b>Microsatellite markers</b> |     |     |     |     |     |      |     |     |     |    |    |    |    |
|--------------------------|-------------------------------|-----|-----|-----|-----|-----|------|-----|-----|-----|----|----|----|----|
| <b><i>Messor sp.</i></b> | v15                           |     | 1F  |     | 2D  |     | m155 |     | 1B  |     | 1A |    | 2C |    |
| Msp847w1                 | x                             | x   | x   | x   | 204 | 210 | 190  | 192 | x   | x   | NA | NA | NA | NA |
| Msp847w2                 | x                             | x   | x   | x   | 210 | 212 | 192  | 192 | x   | x   | NA | NA | NA | NA |
| Msp847w3                 | 132                           | 155 | 163 | 177 | 210 | 220 | 188  | 192 | 175 | 175 | NA | NA | NA | NA |
| Msp847w163               | 132                           | 155 | 169 | 177 | 210 | 212 | 188  | 192 | 175 | 175 | NA | NA | NA | NA |
| Msp847w164               | 132                           | 136 | 169 | 177 | 210 | 212 | 192  | 192 | 175 | 175 | NA | NA | NA | NA |
| Msp847w165               | 132                           | 155 | 169 | 177 | 210 | 220 | 188  | 192 | 175 | 175 | NA | NA | NA | NA |
| Msp847w166               | 136                           | 159 | 163 | 169 | 210 | 226 | 192  | 194 | 175 | 177 | NA | NA | NA | NA |
| Msp847w167               | 132                           | 163 | 165 | 187 | 202 | 210 | 190  | 192 | 175 | 177 | NA | NA | NA | NA |
| Msp847w168               | 147                           | 171 | 169 | 189 | 202 | 212 | 192  | 205 | 175 | 177 | NA | NA | NA | NA |
| Msp847w169               | 147                           | 159 | 165 | 167 | 200 | 212 | 192  | 192 | 177 | 177 | NA | NA | NA | NA |
| Msp847w170               | 132                           | 136 | 169 | 177 | 210 | 220 | 188  | 192 | 175 | 177 | NA | NA | NA | NA |
| Msp847w171               | 132                           | 155 | 169 | 177 | 210 | 220 | 192  | 192 | 175 | 175 | NA | NA | NA | NA |
| Msp847w172               | 157                           | 157 | 163 | 169 | 202 | 212 | 192  | 194 | 177 | 177 | NA | NA | NA | NA |
| Msp847w173               | 132                           | 155 | 169 | 177 | 210 | 220 | 188  | 192 | 175 | 177 | NA | NA | NA | NA |
| Msp847w174               | 157                           | 163 | 163 | 165 | 202 | 212 | 192  | 194 | 175 | 177 | NA | NA | NA | NA |
| Msp7w090                 | 136                           | 149 | 169 | 169 | 202 | 210 | 190  | 205 | 175 | 177 | NA | NA | NA | NA |
| Msp7w091                 | 147                           | 163 | 169 | 169 | 200 | 204 | 190  | 202 | 175 | 175 | NA | NA | NA | NA |
| Msp7w092                 | 136                           | 149 | 169 | 169 | 202 | 210 | 190  | 205 | 175 | 177 | NA | NA | NA | NA |



|           |     |     |     |     |     |     |     |     |     |     |    |    |    |    |
|-----------|-----|-----|-----|-----|-----|-----|-----|-----|-----|-----|----|----|----|----|
| Msp7w093  | 132 | 165 | 161 | 167 | 210 | 228 | 190 | 196 | 175 | 177 | NA | NA | NA | NA |
| Msp7w094  | 149 | 163 | 169 | 169 | 202 | 204 | 192 | 205 | 175 | 177 | NA | NA | NA | NA |
| Msp7w095  | 149 | 163 | 169 | 169 | 202 | 210 | 190 | 205 | 175 | 177 | NA | NA | NA | NA |
| Msp7w124  | 149 | 163 | 169 | 169 | 202 | 204 | 190 | 192 | 175 | 177 | NA | NA | NA | NA |
| Msp7w125  | 163 | 165 | 165 | 169 | 202 | 210 | 190 | 215 | 175 | 177 | NA | NA | NA | NA |
| Msp7w126  | 163 | 165 | 165 | 165 | 202 | 202 | 190 | 215 | 175 | 177 | NA | NA | NA | NA |
| Msp7w127  | 147 | 163 | 169 | 169 | 200 | 210 | 190 | 192 | 175 | 175 | NA | NA | NA | NA |
| Msp7w128  | x   | x   | 161 | 165 | x   | x   | x   | x   | 175 | 177 | NA | NA | NA | NA |
| Msp7w129  | 136 | 149 | x   | x   | 202 | 204 | 190 | 205 | x   | x   | NA | NA | NA | NA |
| Msp2w34   | 149 | 157 | 169 | 177 | 202 | 232 | 190 | 194 | x   | x   | NA | NA | NA | NA |
| Msp2w35   | 157 | 171 | 169 | 173 | 204 | 210 | 190 | 194 | x   | x   | NA | NA | NA | NA |
| Msp2w36   | 136 | 149 | 167 | 175 | 204 | 210 | 188 | 192 | 175 | 175 | NA | NA | NA | NA |
| Msp2w37   | 136 | 171 | 167 | 175 | 202 | 210 | 188 | 215 | 175 | 177 | NA | NA | NA | NA |
| Msp2w38   | 136 | 171 | 167 | 187 | 202 | 210 | 188 | 205 | 175 | 175 | NA | NA | NA | NA |
| Msp2w55   | 143 | 157 | 169 | 171 | 210 | 226 | 188 | 192 | 175 | 177 | NA | NA | NA | NA |
| Msp2w56   | 171 | 171 | 165 | 175 | 202 | 204 | 192 | 215 | 177 | 177 | NA | NA | NA | NA |
| Msp2w57   | 143 | 157 | 165 | 169 | 210 | 226 | 190 | 192 | 175 | 177 | NA | NA | NA | NA |
| Msp2w58   | 143 | 157 | 165 | 169 | 210 | 226 | 188 | 192 | 175 | 177 | NA | NA | NA | NA |
| Msp2w59   | 143 | 157 | 169 | 171 | 210 | 226 | 188 | 192 | 175 | 177 | NA | NA | NA | NA |
| Msp2w60   | 136 | 159 | 169 | 169 | 200 | 210 | 190 | 202 | 175 | 175 | NA | NA | NA | NA |
| Msp14w131 | 157 | 163 | 161 | 165 | 204 | 226 | 192 | 202 | 177 | 177 | NA | NA | NA | NA |
| Msp14w132 | 155 | 171 | 167 | 169 | 202 | 210 | 190 | 215 | 175 | 177 | NA | NA | NA | NA |
| Msp14w133 | 157 | 163 | 161 | 165 | 204 | 214 | 192 | 202 | 177 | 177 | NA | NA | NA | NA |
| Msp14w134 | 155 | 171 | 167 | 169 | 202 | 202 | 192 | 205 | 175 | 177 | NA | NA | NA | NA |
| Msp14w135 | 157 | 171 | 167 | 169 | 202 | 210 | 190 | 190 | 175 | 177 | NA | NA | NA | NA |

|           |     |     |     |     |     |     |     |     |     |     |    |    |    |    |
|-----------|-----|-----|-----|-----|-----|-----|-----|-----|-----|-----|----|----|----|----|
| Msp14w136 | 157 | 171 | 169 | 185 | 202 | 210 | 192 | 205 | 175 | 177 | NA | NA | NA | NA |
| Msp14w137 | 157 | 163 | 161 | 165 | 204 | 214 | 192 | 194 | 177 | 177 | NA | NA | NA | NA |
| Msp14w138 | 136 | 149 | 167 | 169 | 202 | 202 | 192 | 205 | 175 | 177 | NA | NA | NA | NA |
| Msp14w139 | 157 | 163 | 161 | 165 | 204 | 214 | 190 | 194 | 177 | 177 | NA | NA | NA | NA |
| Msp14w140 | 157 | 171 | 167 | 169 | 202 | 210 | 192 | 215 | x   | x   | NA | NA | NA | NA |
| Msp14w141 | 155 | 171 | 167 | 169 | 202 | 202 | 192 | 205 | 175 | 177 | NA | NA | NA | NA |
| Msp14w142 | 155 | 171 | 167 | 169 | 202 | 210 | 192 | 215 | x   | x   | NA | NA | NA | NA |
| Msp40w211 | 136 | 149 | 163 | 169 | 204 | 204 | 192 | 202 | 177 | 177 | NA | NA | NA | NA |
| Msp40w212 | 132 | 157 | 167 | 189 | 200 | 200 | 194 | 205 | 177 | 177 | NA | NA | NA | NA |
| Msp40w213 | 136 | 163 | 163 | 165 | 204 | 210 | 192 | 205 | 175 | 177 | NA | NA | NA | NA |
| Msp40w214 | 136 | 149 | 163 | 169 | 204 | 204 | 192 | 205 | 177 | 177 | NA | NA | NA | NA |
| Msp40w215 | 147 | 149 | 169 | 169 | 210 | 218 | 190 | 194 | 175 | 177 | NA | NA | NA | NA |
| Msp40w216 | 136 | 149 | 163 | 169 | 204 | 204 | 192 | 192 | 177 | 177 | NA | NA | NA | NA |
| Msp40w217 | 149 | 163 | 169 | 169 | 210 | 218 | 190 | 194 | 175 | 175 | NA | NA | NA | NA |
| Msp40w218 | 157 | 163 | 167 | 189 | 200 | 200 | 194 | 209 | 177 | 177 | NA | NA | NA | NA |
| Msp40w219 | 136 | 149 | 163 | 169 | 204 | 204 | 192 | 192 | 177 | 177 | NA | NA | NA | NA |
| Msp40w220 | 132 | 157 | 187 | 189 | 200 | 210 | 194 | 205 | 177 | 177 | NA | NA | NA | NA |
| Msp40w221 | 136 | 149 | 163 | 169 | 204 | 204 | 192 | 205 | 177 | 195 | NA | NA | NA | NA |
| Msp40w222 | 132 | 157 | 167 | 189 | 200 | 200 | 194 | 209 | 177 | 177 | NA | NA | NA | NA |
| Msp8w181  | 151 | 159 | 167 | 173 | 204 | 204 | 192 | 192 | 175 | 177 | NA | NA | NA | NA |
| Msp8w182  | 149 | 159 | 167 | 169 | 204 | 204 | 192 | 196 | 175 | 177 | NA | NA | NA | NA |
| Msp8w183  | 149 | 159 | 167 | 173 | 204 | 204 | 192 | 192 | 175 | 177 | NA | NA | NA | NA |
| Msp8w184  | 149 | 159 | 167 | 169 | 202 | 204 | 192 | 192 | 175 | 177 | NA | NA | NA | NA |
| Msp8w185  | 149 | 159 | 167 | 173 | 202 | 204 | 192 | 192 | 175 | 177 | NA | NA | NA | NA |
| Msp8w186  | 149 | 159 | 167 | 169 | 202 | 204 | 192 | 192 | 175 | 177 | NA | NA | NA | NA |

|          |     |     |     |     |     |     |     |     |     |     |    |    |    |    |
|----------|-----|-----|-----|-----|-----|-----|-----|-----|-----|-----|----|----|----|----|
| Msp8w187 | 136 | 163 | 165 | 167 | 202 | 226 | 192 | 194 | 177 | 177 | NA | NA | NA | NA |
| Msp8w188 | 149 | 159 | 167 | 173 | 204 | 204 | 192 | 192 | 175 | 177 | NA | NA | NA | NA |
| Msp8w189 | 155 | 157 | 167 | 169 | 202 | 210 | 192 | 194 | 175 | 177 | NA | NA | NA | NA |
| Msp8w190 | 151 | 159 | 167 | 173 | 202 | 204 | 192 | 196 | 175 | 175 | NA | NA | NA | NA |
| Msp8w191 | 136 | 163 | 165 | 167 | 226 | 226 | 192 | 194 | 175 | 177 | NA | NA | NA | NA |
| Msp8w192 | 136 | 163 | 165 | 167 | 202 | 226 | 192 | 194 | 175 | 177 | NA | NA | NA | NA |
| Msp3w246 | 143 | 143 | 160 | 169 | 204 | 204 | 192 | 202 | 175 | 175 | NA | NA | NA | NA |
| Msp3w247 | 161 | 161 | 165 | 175 | 204 | 214 | 192 | 215 | 175 | 175 | NA | NA | NA | NA |
| Msp3w248 | 143 | 143 | 160 | 169 | 204 | 204 | 192 | 202 | 175 | 175 | NA | NA | NA | NA |
| Msp3w252 | 143 | 143 | 160 | 169 | 204 | 204 | 192 | 202 | x   | x   | NA | NA | NA | NA |
| Msp3w253 | 143 | 157 | 167 | 169 | 204 | 204 | 192 | 194 | x   | x   | NA | NA | NA | NA |
| Msp3w254 | 143 | 143 | 160 | 169 | 204 | 204 | 192 | 202 | x   | x   | NA | NA | NA | NA |
| Msp3w255 | 143 | 157 | 160 | 169 | 204 | 204 | 190 | 192 | x   | x   | NA | NA | NA | NA |
| Msp3w256 | 157 | 159 | 167 | 175 | 202 | 202 | 190 | 192 | x   | x   | NA | NA | NA | NA |
| Msp3w257 | 153 | 157 | 169 | 175 | 202 | 202 | 190 | 192 | x   | x   | NA | NA | NA | NA |
| Msp5w234 | 153 | 163 | 167 | 167 | 204 | 210 | 192 | 200 | x   | x   | NA | NA | NA | NA |
| Msp5w235 | 140 | 171 | 165 | 169 | 202 | 212 | 190 | 192 | x   | x   | NA | NA | NA | NA |
| Msp5w236 | 140 | 171 | 163 | 167 | 202 | 210 | 190 | 192 | x   | x   | NA | NA | NA | NA |
| Msp5w237 | 136 | 163 | 165 | 169 | 202 | 204 | 192 | 202 | x   | x   | NA | NA | NA | NA |
| Msp5w238 | 140 | 149 | 163 | 163 | 202 | 212 | 190 | 192 | x   | x   | NA | NA | NA | NA |
| Msp5w239 | 136 | 163 | 163 | 169 | 202 | 204 | 192 | 192 | x   | x   | NA | NA | NA | NA |
| Msp5w240 | 140 | 149 | 163 | 163 | 202 | 210 | 190 | 192 | x   | x   | NA | NA | NA | NA |
| Msp5w241 | 140 | 171 | 163 | 163 | 202 | 212 | 190 | 192 | x   | x   | NA | NA | NA | NA |
| Msp5w242 | 140 | 149 | 163 | 167 | 202 | 212 | 190 | 192 | x   | x   | NA | NA | NA | NA |
| Msp5w243 | 153 | 163 | 167 | 171 | 204 | 210 | 192 | 221 | x   | x   | NA | NA | NA | NA |

|            |     |     |     |     |     |     |     |     |   |   |    |    |    |    |
|------------|-----|-----|-----|-----|-----|-----|-----|-----|---|---|----|----|----|----|
| Msp5w244   | 140 | 171 | 165 | 169 | 202 | 210 | 190 | 192 | x | x | NA | NA | NA | NA |
| Msp5w245   | 149 | 171 | 167 | 167 | 204 | 210 | 190 | 192 | x | x | NA | NA | NA | NA |
| Msp6w264   | 145 | 163 | 165 | 167 | 210 | 224 | 190 | 205 | x | x | NA | NA | NA | NA |
| Msp6w265   | 145 | 163 | 167 | 169 | 210 | 224 | 190 | 205 | x | x | NA | NA | NA | NA |
| Msp6w266   | 145 | 163 | 165 | 167 | 204 | 210 | 190 | 205 | x | x | NA | NA | NA | NA |
| Msp6w267   | 145 | 163 | 165 | 167 | 204 | 210 | 190 | 205 | x | x | NA | NA | NA | NA |
| Msp6w268-R | 157 | 157 | 165 | 167 | 202 | 202 | 190 | 192 | x | x | NA | NA | NA | NA |
| Msp6w269   | 143 | 163 | 165 | 167 | 204 | 210 | 190 | 205 | x | x | NA | NA | NA | NA |
| Msp6w270-R | 147 | 157 | 165 | 165 | 210 | 212 | 190 | 192 | x | x | NA | NA | NA | NA |
| Msp6w271   | 145 | 163 | 165 | 167 | 210 | 224 | 190 | 205 | x | x | NA | NA | NA | NA |

***Messor arenarius***

|          |     |     |     |     |     |     |     |     |    |    |     |     |     |     |
|----------|-----|-----|-----|-----|-----|-----|-----|-----|----|----|-----|-----|-----|-----|
| Ma21in58 | 128 | 128 | 179 | 179 | 206 | 214 | 177 | 177 | NA | NA | 162 | 164 | 168 | 168 |
| Ma21in59 | 128 | 128 | 179 | 179 | 206 | 214 | 177 | 177 | NA | NA | 162 | 164 | 168 | 168 |
| Ma21in60 | 128 | 128 | 179 | 179 | 198 | 214 | 177 | 177 | NA | NA | 162 | 182 | 168 | 168 |
| Ma21in66 | 128 | 128 | 179 | 179 | 198 | 214 | 177 | 193 | NA | NA | 162 | 164 | 168 | 168 |
| Ma21in67 | 128 | 128 | 179 | 179 | 206 | 214 | 177 | 193 | NA | NA | 162 | 164 | 168 | 168 |
| Ma21in68 | 128 | 128 | 179 | 179 | 198 | 214 | 177 | 193 | NA | NA | 162 | 182 | 168 | 168 |
| Ma21f534 | 128 | 128 | 179 | 179 | 206 | 214 | 177 | 177 | NA | NA | 162 | 164 | 168 | 168 |
| Ma21f535 | 128 | 128 | 179 | 179 | 198 | 214 | 177 | 177 | NA | NA | 162 | 164 | 168 | 168 |
| Ma21f536 | 128 | 128 | 179 | 179 | 206 | 214 | 177 | 177 | NA | NA | 162 | 182 | 168 | 168 |
| Ma21f537 | 128 | 128 | 179 | 179 | 206 | 214 | 177 | 193 | NA | NA | 162 | 164 | 168 | 168 |
| Ma21f538 | 128 | 128 | 179 | 179 | 206 | 214 | 177 | 193 | NA | NA | 162 | 182 | 168 | 174 |
| Ma21f539 | 128 | 128 | 179 | 179 | 198 | 214 | 177 | 193 | NA | NA | 162 | 164 | 168 | 174 |
| Ma861w2  | 118 | 118 | 173 | 182 | 210 | 212 | x   | x   | NA | NA | 162 | 182 | 174 | 178 |
| Ma861w3  | 118 | 118 | 173 | 182 | 200 | 214 | x   | x   | NA | NA | 182 | 184 | 178 | 178 |

|          |     |     |     |     |     |     |     |     |    |    |     |     |     |     |
|----------|-----|-----|-----|-----|-----|-----|-----|-----|----|----|-----|-----|-----|-----|
| Ma861w4  | 118 | 118 | 175 | 182 | 190 | 214 | x   | x   | NA | NA | x   | x   | x   | x   |
| Ma861w5  | 118 | 118 | 175 | 182 | 190 | 214 | x   | x   | NA | NA | x   | x   | x   | x   |
| Ma861w6  | 115 | 115 | 173 | 177 | 200 | 214 | x   | x   | NA | NA | x   | x   | x   | x   |
| Ma861w7  | 115 | 115 | 173 | 182 | 214 | 214 | x   | x   | NA | NA | 182 | 184 | 174 | 178 |
| Ma861w8  | 118 | 118 | 175 | 182 | 190 | 214 | x   | x   | NA | NA | x   | x   |     |     |
| Ma861w10 | 118 | 118 | 173 | 182 | 200 | 214 | x   | x   | NA | NA | x   | x   | x   | x   |
| Ma861w11 | 118 | 118 | 173 | 177 | 214 | 214 | x   | x   | NA | NA | x   | x   | x   | x   |
| Ma861w12 | 115 | 115 | 173 | 177 | 200 | 214 | x   | x   | NA | NA | x   | x   | x   | x   |
| Ma6s159  | x   | x   | 173 | 182 | 214 | 214 | 177 | 193 | NA | NA | 162 | 182 | 178 | 178 |
| Ma6s160  | x   | x   | 175 | 177 | 190 | 210 | 177 | 193 | NA | NA | 162 | 162 | 168 | 178 |
| Ma6s161  | x   | x   | 175 | 182 | 190 | 214 | 177 | 193 | NA | NA | 162 | 184 | 168 | 178 |
| Ma6s179  | 115 | 115 | 173 | 177 | 200 | 214 | 177 | 181 | NA | NA | 162 | 182 | 178 | 178 |
| Ma6s180  | 119 | 119 | 173 | 182 | 214 | 214 | 177 | 181 | NA | NA | 162 | 182 | 178 | 178 |
| Ma6s181  | 119 | 119 | 173 | 177 | 200 | 214 | 177 | 181 | NA | NA | 182 | 184 | 178 | 178 |
| Ma6f580  | 115 | 115 | 173 | 177 | 214 | 214 | 177 | 181 | NA | NA | 162 | 182 | 178 | 178 |
| Ma6f581  | 115 | 115 | 175 | 182 | 190 | 214 | 177 | 177 | NA | NA | 162 | 162 | 168 | 174 |
| Ma6f582  | 115 | 115 | 173 | 177 | 214 | 214 | 177 | 181 | NA | NA | 162 | 182 | 178 | 178 |
| Ma6w597  | 119 | 119 | 175 | 182 | 190 | 214 | x   | x   | NA | NA | 162 | 184 | 168 | 174 |
| Ma6w598  | 115 | 115 | 175 | 182 | 190 | 190 | x   | x   | NA | NA | 162 | 184 | 168 | 178 |
| Ma6w599  | 119 | 119 | 175 | 182 | 190 | 214 | x   | x   | NA | NA | 162 | 184 | 168 | 174 |
| Ma24w1   | 115 | 115 | 173 | 177 | 214 | 214 | x   | x   | NA | NA | 182 | 184 | 178 | 178 |
| Ma24w2   | 119 | 119 | 175 | 182 | 190 | 214 | x   | x   | NA | NA | 162 | 162 | 168 | 178 |
| Ma24w3   | 119 | 119 | 173 | 177 | 214 | 214 | x   | x   | NA | NA | 162 | 182 | 178 | 178 |
| Ma24w4   | 119 | 119 | 173 | 177 | x   | x   | x   | x   | NA | NA | 162 | 182 | 178 | 178 |
| Ma24s192 | 119 | 119 | 173 | 177 | 214 | 214 | 177 | 181 | NA | NA | 182 | 184 | 174 | 178 |

|          |     |     |     |     |     |     |     |     |    |    |     |     |     |     |
|----------|-----|-----|-----|-----|-----|-----|-----|-----|----|----|-----|-----|-----|-----|
| Ma24s193 | 119 | 119 | 175 | 177 | 190 | 214 | 177 | 177 | NA | NA | 162 | 162 | 168 | 178 |
| Ma24s194 | 115 | 115 | 173 | 182 | 214 | 214 | 177 | 181 | NA | NA | 162 | 182 | 174 | 178 |
| Ma24s195 | x   | x   | 175 | 182 | 190 | 214 | 177 | 193 | NA | NA | 162 | 184 | 168 | 174 |
| Ma24s196 | x   | x   | 175 | 182 | 190 | 214 | 177 | 193 | NA | NA | 162 | 184 | 168 | 178 |
| Ma24s197 | x   | x   | 175 | 177 | 190 | 214 | 177 | 193 | NA | NA | 162 | 184 | 168 | 178 |
| Maf529   | 115 | 115 | 175 | 177 | 190 | 214 | 177 | 177 | NA | NA | 162 | 162 | 168 | 178 |
| Maf530   | 119 | 119 | 173 | 182 | 214 | 214 | 177 | 181 | NA | NA | 182 | 184 | 174 | 178 |
| Ma25in22 | x   | x   | 175 | 177 | 190 | 214 | 177 | 193 | NA | NA | 162 | 162 | 168 | 178 |
| Ma25in23 | x   | x   | 175 | 177 | 190 | 214 | 177 | 193 | NA | NA | 162 | 162 | 168 | 178 |
| Ma25in24 | x   | x   | 175 | 177 | 190 | 214 | 177 | 193 | NA | NA | 162 | 162 | 168 | 178 |
| Ma25in40 | 115 | 115 | 175 | 182 | 190 | 214 | 177 | 177 | NA | NA | 162 | 184 | 168 | 178 |
| Ma25in41 | 115 | 115 | 173 | 177 | 200 | 214 | 177 | 181 | NA | NA | 182 | 184 | 174 | 178 |
| Ma25in42 | 119 | 119 | 175 | 177 | 190 | 214 | 177 | 177 | NA | NA | 162 | 162 | 168 | 174 |
| Ma25f531 | 119 | 119 | 173 | 182 | 200 | 214 | 177 | 181 | NA | NA | 182 | 184 | 174 | 178 |
| Ma25f532 | 115 | 115 | 173 | 182 | 214 | 214 | 177 | 181 | NA | NA | 162 | 182 | 178 | 178 |
| Ma25f540 | x   | x   | 175 | 177 | 190 | 214 | x   | x   | NA | NA | 162 | 162 | 168 | 178 |
| Ma25f541 | x   | x   | 175 | 177 | 190 | 214 | 177 | 193 | NA | NA | 162 | 184 | 168 | 174 |
| Ma25f542 | x   | x   | 173 | 182 | x   | x   | 177 | 193 | NA | NA | 182 | 184 | 178 | 178 |
| Ma31w621 | x   | x   | 173 | 177 | x   | x   | x   | x   | NA | NA | 182 | 184 | 174 | 178 |
| Ma31w622 | x   | x   | 175 | 177 | 190 | 214 | x   | x   | NA | NA | 162 | 184 | 168 | 174 |
| Ma31w623 | x   | x   | 173 | 177 | 214 | 214 | x   | x   | NA | NA | 182 | 184 | 178 | 178 |
| Ma31w624 | x   | x   | 175 | 177 | 190 | 190 | x   | x   | NA | NA | 162 | 162 | 168 | x   |
| Ma31w625 | x   | x   | 175 | 182 | 190 | 190 | x   | x   | NA | NA | x   | x   | x   | x   |
| Ma31w626 | x   | x   | 175 | 182 | 190 | 214 | x   | x   | NA | NA | 162 | 184 | 168 | 174 |
| Ma31w627 | x   | x   | 173 | 182 | 214 | 214 | x   | x   | NA | NA | 182 | 184 | 178 | 178 |

|          |     |     |     |     |     |     |     |     |    |    |     |     |     |     |
|----------|-----|-----|-----|-----|-----|-----|-----|-----|----|----|-----|-----|-----|-----|
| Ma31w628 | x   | x   | 173 | 182 | 214 | 214 | x   | x   | NA | NA | 162 | 184 | 178 | 178 |
| Ma31w629 | x   | x   | 173 | 182 | 214 | 214 | x   | x   | NA | NA | 182 | 184 | 178 | 178 |
| Ma31w630 | x   | x   | 175 | 177 | 190 | 214 | x   | x   | NA | NA | 162 | 162 | 168 | 178 |
| Ma31w631 | x   | x   | 175 | 182 | 190 | 190 | x   | x   | NA | NA | 162 | 184 | 168 | 174 |
| Ma31w632 |     |     | 173 | 182 | 210 | 214 |     |     | NA | NA | 182 | 184 | 174 | 178 |
| Ma26in04 | 115 | 115 | 175 | 175 | 202 | 206 | x   | x   | NA | NA | 158 | 188 | 176 | 178 |
| Ma26in05 | 115 | 115 | 175 | 182 | 202 | 206 | 177 | 177 | NA | NA | 158 | 188 | 174 | 178 |
| Ma26in06 | 115 | 115 | 175 | 182 | 202 | 206 | 177 | 177 | NA | NA | 158 | 162 | 174 | 178 |
| Ma26s141 | x   | x   | 175 | 175 | 202 | 206 |     |     | NA | NA | x   | x   |     |     |
| Ma26s142 | x   | x   | 175 | 182 | 202 | 206 | 177 | 193 | NA | NA | 158 | 162 | 176 | 178 |
| Ma26s143 | x   | x   | 175 | 175 | 202 | 206 | 177 | 193 | NA | NA | 158 | 162 | 174 | 178 |
| Ma26s144 | 115 | 115 | 175 | 175 | 202 | 206 | 177 | 177 | NA | NA | 158 | 162 | x   | x   |
| Ma26s145 | 115 | 115 | 175 | 175 | 202 | 206 | x   | x   | NA | NA | 158 | 162 | 176 | 178 |
| Ma26s146 | 115 | 115 | 175 | 182 | 202 | 206 | 177 | 177 | NA | NA | 158 | 162 | 174 | 178 |
| Ma26f147 | 115 | 115 | 175 | 182 | 202 | 206 | 177 | 177 | NA | NA | 158 | 188 | 176 | 178 |
| Ma26f148 | x   | x   | 175 | 175 | 202 | 206 | x   | x   | NA | NA | x   | x   | x   | x   |
| Ma26f149 | 115 | 115 | 175 | 175 | 202 | 206 | 177 | 177 | NA | NA | 158 | 162 | 174 | 178 |
| Ma27s84  | 115 | 115 | 175 | 182 | 210 | 210 | 177 | 195 | NA | NA | 162 | 166 | x   | x   |
| Ma27s85  | 115 | 115 | 175 | 182 | 200 | 214 | 177 | 195 | NA | NA | 162 | 166 | 174 | 176 |
| Ma27s86  | 115 | 115 | 175 | 182 | 210 | 210 | 177 | 195 | NA | NA | 162 | 166 | 174 | 176 |
| Ma27s87  | x   | x   | 175 | 182 | 210 | 210 | 177 | 195 | NA | NA | 162 | 182 | 168 | 174 |
| Ma27s88  | x   | x   | 175 | 175 | 200 | 214 | 177 | 195 | NA | NA | 162 | 166 | 174 | 176 |
| Ma27s89  | x   | x   | 175 | 175 | 210 | 214 | 177 | 195 | NA | NA | 162 | 166 | 168 | 176 |
| Ma27f156 | 115 | 115 | 175 | 175 | 210 | 214 | 177 | 195 | NA | NA | 162 | 166 | 174 | 168 |
| Ma27f157 | 115 | 115 | 175 | 175 | 200 | 214 | 177 | 195 | NA | NA | 162 | 182 | 174 | 168 |

|           |     |     |     |     |     |     |     |     |    |    |     |     |     |     |
|-----------|-----|-----|-----|-----|-----|-----|-----|-----|----|----|-----|-----|-----|-----|
| Ma27f158  | 115 | 115 | 175 | 175 | 210 | 210 | 177 | 195 | NA | NA | 162 | 166 | 174 | 176 |
| Ma27F495  | x   | x   | 175 | 182 | 200 | 214 | 177 | 195 | NA | NA | 162 | 166 | 168 | 174 |
| Ma27F496  | x   | x   | 175 | 182 | 200 | 212 | 177 | 193 | NA | NA | 162 | 166 | 168 | 174 |
| Ma27F497  | x   | x   | 175 | 175 | 210 | 214 | 177 | 195 | NA | NA | 162 | 166 | 168 | 174 |
| Ma852w570 | x   | x   | 175 | 175 | 202 | 204 | x   | x   | NA | NA | 162 | 186 | 174 | 176 |
| Ma852w571 | x   | x   | 175 | 175 | 202 | 204 | x   | x   | NA | NA | 162 | 186 | 174 | 176 |
| Ma852w572 | x   | x   | 175 | 175 | 202 | 202 | x   | x   | NA | NA | 162 | 186 | 174 | 176 |
| Ma852w573 | x   | x   | 175 | 175 | 202 | 204 | x   | x   | NA | NA | 162 | 186 | 174 | 174 |
| Ma852w574 | x   | x   | 175 | 175 | 202 | 202 | x   | x   | NA | NA | 162 | 186 | 174 | 174 |
| Ma852w575 | x   | x   | 175 | 175 | 202 | 204 | x   | x   | NA | NA | 162 | 162 | 168 | 174 |
| Ma852w576 | x   | x   | 175 | 179 | 202 | 202 | x   | x   | NA | NA | 184 | 186 | 176 | 176 |
| Ma852w577 | x   | x   | 175 | 175 | 202 | 202 | x   | x   | NA | NA | 162 | 162 | 174 | 174 |
| Ma852w578 | x   | x   | 175 | 175 | 202 | 202 | x   | x   | NA | NA | 162 | 186 | 174 | 174 |
| Ma852w579 | x   | x   | 175 | 175 | 202 | 204 | x   | x   | NA | NA | 162 | 186 | 176 | 176 |
| Ma852w601 | x   | x   | 175 | 175 | 202 | 202 | x   | x   | NA | NA | 162 | 186 | 174 | 174 |
| Ma23w637  | 116 | 126 | 175 | 182 | 190 | 190 | x   | x   | NA | NA | x   | x   | x   | x   |
| Ma23w638  | 116 | 126 | 173 | 182 | 190 | 210 | x   | x   | NA | NA | x   | x   | x   | x   |
| Ma23w639  | 115 | 116 | 173 | 182 | 190 | 210 | x   | x   | NA | NA | x   | x   | x   | x   |
| Ma23w640  | 116 | 126 | 173 | 182 | 190 | 210 | x   | x   | NA | NA | x   | x   | x   | x   |
| Ma23w641  | 116 | 126 | 173 | 182 | 190 | 210 | x   | x   | NA | NA | x   | x   | x   | x   |
| Ma23w642  | 115 | 115 | 175 | 175 | 190 | 202 | x   | x   | NA | NA | x   | x   | x   | x   |
| Ma23w643  | 116 | 126 | 173 | 182 | 190 | 210 | x   | x   | NA | NA | x   | x   | x   | x   |
| Ma23w644  | 116 | 126 | 173 | 182 | 190 | 210 | x   | x   | NA | NA | x   | x   | x   | x   |
| Ma23w645  | 116 | 126 | 175 | 182 | 190 | 190 | x   | x   | NA | NA | x   | x   | x   | x   |
| Ma23w646  | 118 | 126 | 175 | 182 | 190 | 190 | x   | x   | NA | NA | 162 | 186 | 174 | 174 |



|          |     |     |     |     |     |     |   |   |    |    |     |     |     |     |
|----------|-----|-----|-----|-----|-----|-----|---|---|----|----|-----|-----|-----|-----|
| Ma23w647 | 116 | 118 | 173 | 182 | 190 | 190 | x | x | NA | NA | 162 | 186 | 174 | 174 |
| Ma23w648 | 126 | 126 | 173 | 175 | 190 | 202 | x | x | NA | NA | 162 | 186 | 174 | 176 |
| Ma23w649 | 116 | 118 | 173 | 182 | 190 | 210 | x | x | NA | NA | 162 | 162 | 176 | 176 |
| Ma23w650 | 116 | 118 | 173 | 182 | 190 | 210 | x | x | NA | NA | 162 | 162 | 176 | 176 |
| Ma23w651 | 118 | 126 | 173 | 182 | 190 | 190 | x | x | NA | NA | 162 | 186 | 176 | 176 |
| Ma23w652 | 126 | 126 | 173 | 173 | 202 | 210 | x | x | NA | NA | 186 | 186 | 176 | 176 |
| Ma23w653 | 116 | 116 | 173 | 175 | 202 | 210 | x | x | NA | NA | 186 | 186 | 174 | 176 |
| Ma23w654 | 116 | 116 | 175 | 175 | 190 | 202 | x | x | NA | NA | 186 | 186 | 174 | 176 |
| Ma23w655 | 116 | 118 | 175 | 182 | 190 | 210 | x | x | NA | NA | 162 | 186 | 174 | 176 |
| Ma23w656 | 118 | 126 | 175 | 182 | 190 | 190 | x | x | NA | NA | 162 | 186 | 174 | 176 |
| Ma23w657 | 116 | 118 | 175 | 182 | 190 | 210 | x | x | NA | NA | 162 | 162 | 174 | 176 |
| Ma28w658 | 116 | 116 | 182 | 182 | 204 | 204 | x | x | NA | NA | 162 | 182 | 174 | 178 |
| Ma28w659 | 116 | 124 | 182 | 182 | 204 | 204 | x | x | NA | NA | 162 | 182 | 174 | 178 |
| Ma28w660 | 124 | 126 | 175 | 182 | 210 | 210 | x | x | NA | NA | 162 | 164 | 178 | 178 |
| Ma28w661 | 116 | 116 | 175 | 182 | 210 | 210 | x | x | NA | NA | 162 | 182 | 174 | 178 |
| Ma28w662 | 116 | 124 | 182 | 182 | 210 | 210 | x | x | NA | NA | 162 | 182 | 174 | 178 |
| Ma28w663 | 116 | 124 | 175 | 182 | 210 | 210 | x | x | NA | NA | 162 | 182 | 174 | 178 |
| Ma28w664 | 116 | 124 | 175 | 182 | 204 | 204 | x | x | NA | NA | 162 | 182 | 174 | 178 |
| Ma28w666 | 116 | 116 | 182 | 182 | 210 | 210 | x | x | NA | NA | 162 | 182 | 174 | 178 |
| Ma28w667 | 116 | 124 | 182 | 182 | 210 | 210 | x | x | NA | NA | 162 | 182 | 174 | 178 |
| Ma28w668 | 126 | 126 | 175 | 182 | 204 | 204 | x | x | NA | NA | 162 | 164 | 178 | 178 |
| Ma28w669 | 116 | 116 | 182 | 182 | 210 | 210 | x | x | NA | NA | 162 | 182 | 174 | 178 |
| Ma33w01  | 115 | 125 | 177 | 182 | 202 | 202 | x | x | NA | NA | 162 | 193 | 168 | 174 |
| Ma33w02  | 115 | 116 | 179 | 179 | 202 | 202 | x | x | NA | NA | 162 | 167 | 168 | 168 |
| Ma33w03  | x   | x   | 175 | 182 | 190 | 200 | x | x | NA | NA | 162 | 182 | 168 | 168 |

|           |     |     |     |     |     |     |   |   |    |    |     |     |     |     |
|-----------|-----|-----|-----|-----|-----|-----|---|---|----|----|-----|-----|-----|-----|
| Ma33w04   | 115 | 115 | 175 | 177 | 200 | 200 | x | x | NA | NA | 162 | 182 | 168 | 168 |
| Ma33w05   | 115 | 116 | 175 | 177 | 210 | 210 | x | x | NA | NA | 162 | 167 | 168 | 168 |
| Ma33w06   | 115 | 116 | 175 | 177 | 210 | 210 | x | x | NA | NA | 162 | 167 | 168 | 168 |
| Ma33w07   | x   | x   | 175 | 182 | 200 | 200 | x | x | NA | NA | 162 | 162 | 168 | 168 |
| Ma33w08   | 115 | 115 | 175 | 182 | 210 | 210 | x | x | NA | NA | x   | x   | x   | x   |
| Ma33w09   | 115 | 115 | 175 | 177 | 190 | 200 | x | x | NA | NA | x   | x   | x   | x   |
| Ma33w10   | 115 | 115 | 177 | 179 | 210 | 210 | x | x | NA | NA | x   | x   | x   | x   |
| Ma33w11   | 115 | 116 | 175 | 175 | 202 | 202 | x | x | NA | NA | x   | x   | x   | x   |
| Ma33w12   | 115 | 115 | 175 | 177 | 200 | 200 | x | x | NA | NA | x   | x   | x   | x   |
| Ma34w01   | 116 | 135 | 173 | 179 | 190 | 202 | x | x | NA | NA | x   | x   | x   | x   |
| Ma34w02   | 115 | 115 | 175 | 179 | 190 | 202 | x | x | NA | NA | x   | x   | x   | x   |
| Ma34w03   | x   | x   | 175 | 179 | 190 | 202 | x | x | NA | NA | x   | x   | x   | x   |
| Ma34w04   | x   | x   | x   | x   | 190 | 202 | x | x | NA | NA | x   | x   | x   | x   |
| Ma34w05   | x   | x   | 175 | 179 | 190 | 190 | x | x | NA | NA | x   | x   | x   | x   |
| Ma34w07   | 115 | 115 | 175 | 179 | 190 | 202 | x | x | NA | NA | x   | x   | x   | x   |
| Ma34w08   | x   | x   | 175 | 179 | 190 | 190 | x | x | NA | NA | x   | x   | x   | x   |
| Ma34w09   | 115 | 115 | 175 | 179 | 190 | 190 | x | x | NA | NA | x   | x   | x   | x   |
| Ma34w10   | 115 | 115 | 173 | 179 | 190 | 202 | x | x | NA | NA | 166 | 168 | 168 | 174 |
| Ma34w11   | 115 | 115 | 175 | 179 | 190 | 202 | x | x | NA | NA | 166 | 168 | 168 | 174 |
| Ma34w12   | 115 | 115 | 175 | 179 | 190 | 190 | x | x | NA | NA | 166 | 168 | 168 | 174 |
| Ma210w679 | x   | x   | 173 | 179 | 190 | 202 | x | x | NA | NA | 166 | 182 | 168 | 178 |
| Ma210w680 | x   | x   | 175 | 179 | 190 | 190 | x | x | NA | NA | 166 | 168 | 168 | 178 |
| Ma210w681 | x   | x   | 173 | 179 | 190 | 190 | x | x | NA | NA | 166 | 168 | 168 | 174 |
| Ma210w682 | x   | x   | 175 | 179 | 190 | 190 | x | x | NA | NA | 166 | 168 | 168 | 178 |
| Ma210w683 | x   | x   | 175 | 179 | 190 | 190 | x | x | NA | NA | 166 | 168 | 168 | 178 |

|           |     |     |     |     |     |     |   |   |    |    |     |     |     |     |
|-----------|-----|-----|-----|-----|-----|-----|---|---|----|----|-----|-----|-----|-----|
| Ma210w684 | x   | x   | 173 | 179 | 190 | 190 | x | x | NA | NA | 166 | 168 | 168 | 174 |
| Ma210w685 | x   | x   | 175 | 179 | 190 | 190 | x | x | NA | NA | 166 | 168 | 168 | 174 |
| Ma210w686 | x   | x   | 175 | 179 | 190 | 190 | x | x | NA | NA | 166 | 168 | 168 | 178 |
| Ma210w687 | x   | x   | 175 | 179 | 190 | 202 | x | x | NA | NA | 166 | 168 | 168 | 174 |
| Ma210w688 | x   | x   | 175 | 179 | 190 | 190 | x | x | NA | NA | 166 | 182 | 168 | 178 |
| Ma210w689 | x   | x   | 173 | 179 | 190 | 190 | x | x | NA | NA | 166 | 168 | 168 | 174 |
| Ma210w690 | x   | x   | 173 | 179 | 190 | 202 | x | x | NA | NA | 166 | 182 | 168 | 174 |
| Ma30w1    | 116 | 135 | 175 | 179 | 190 | 190 | x | x | NA | NA | 166 | 168 | 168 | 178 |
| Ma30w2    | 115 | 115 | 175 | 179 | 190 | 190 | x | x | NA | NA | 166 | 168 | 168 | 178 |
| Ma30w3    | 115 | 115 | 175 | 179 | 190 | 202 | x | x | NA | NA | x   | x   | x   | x   |
| Ma30w4    | 116 | 135 | 175 | 179 | 190 | 202 | x | x | NA | NA | x   | x   | x   | x   |
| Ma30w5    | 116 | 135 | 173 | 179 | 190 | 202 | x | x | NA | NA | x   | x   | x   | x   |
| Ma30w6    | 116 | 135 | 173 | 179 | 190 | 202 | x | x | NA | NA | x   | x   | x   | x   |
| Ma30w7    | 115 | 115 | 173 | 179 | 190 | 202 | x | x | NA | NA | x   | x   | x   | x   |
| Ma30w8    | 115 | 115 | 175 | 179 | 190 | 190 | x | x | NA | NA | x   | x   | x   | x   |
| Ma30w9    | 115 | 115 | 173 | 179 | 190 | 190 | x | x | NA | NA | x   | x   | x   | x   |
| Ma30w10   | 115 | 115 | 175 | 179 | 190 | 202 | x | x | NA | NA | x   | x   | x   | x   |
| Ma30w11   | 115 | 115 | 175 | 179 | 190 | 190 | x | x | NA | NA | x   | x   | x   | x   |
| Ma30w12   | 115 | 115 | 173 | 179 | 190 | 190 | x | x | NA | NA | x   | x   | x   | x   |

## **A short description of the molecular analysis conducted**

For *M. sp.*, five microsatellite markers were amplified. Polymerase chain reactions (hereafter, PCR) were carried out in three sets of co-amplified loci. For *M. arenarius*, six microsatellite markers were amplified. PCR were carried out in three sets of co-amplified loci (Table S4). For both species, the primer volumes required a 10 $\mu$ Mol concentration and were equal for both *Forward* and *Reverse* primers. Each PCR was performed in a 15- $\mu$ L volume containing 1  $\mu$ L of DNA solution, 1 $\mu$ l of Q-Solution (Qiagen, excluding **arenarius2** set) and 7.5 $\mu$ l of 2X Taq-PCR Mastermix (Qiagen). Forward primers were 5'-end labeled with a fluorescent dye, either 6-FAM, HEX or TET. For each individual, the amplified products were post-PCR combined for genotyping analysis, in which alleles were separated on ABI 3730 capillary sequencer (Applied Biosystems, Foster City, CA, USA) and sized against Liz 600 sizing standards (BioVentures, Murfreesboro, TN, USA) using Gene Marker<sup>®</sup> HID (Holland & Parson 2011). Controls for genotyping errors due to null alleles were analyzed following the Expectation Maximization algorithm of Dempster et al. (1977) implemented in the FREE NA software (Chapuis&Estoup 2007). Estimation of linkage disequilibrium was performed in GENEPOP on the Web (Rousset 2008).

**Figure S1:** Laboratory aggression assays between *M. arenarius* (the large ant) and *M.sp.* (the small ant). Different levels of *M. arenarius* aggression towards *M. sp.*: (A) antennation, (B) mandibular threat, (C) short biting with the mandibles,(D) curling the guster and spraying. The threat run behavior is the only behavior missing here:

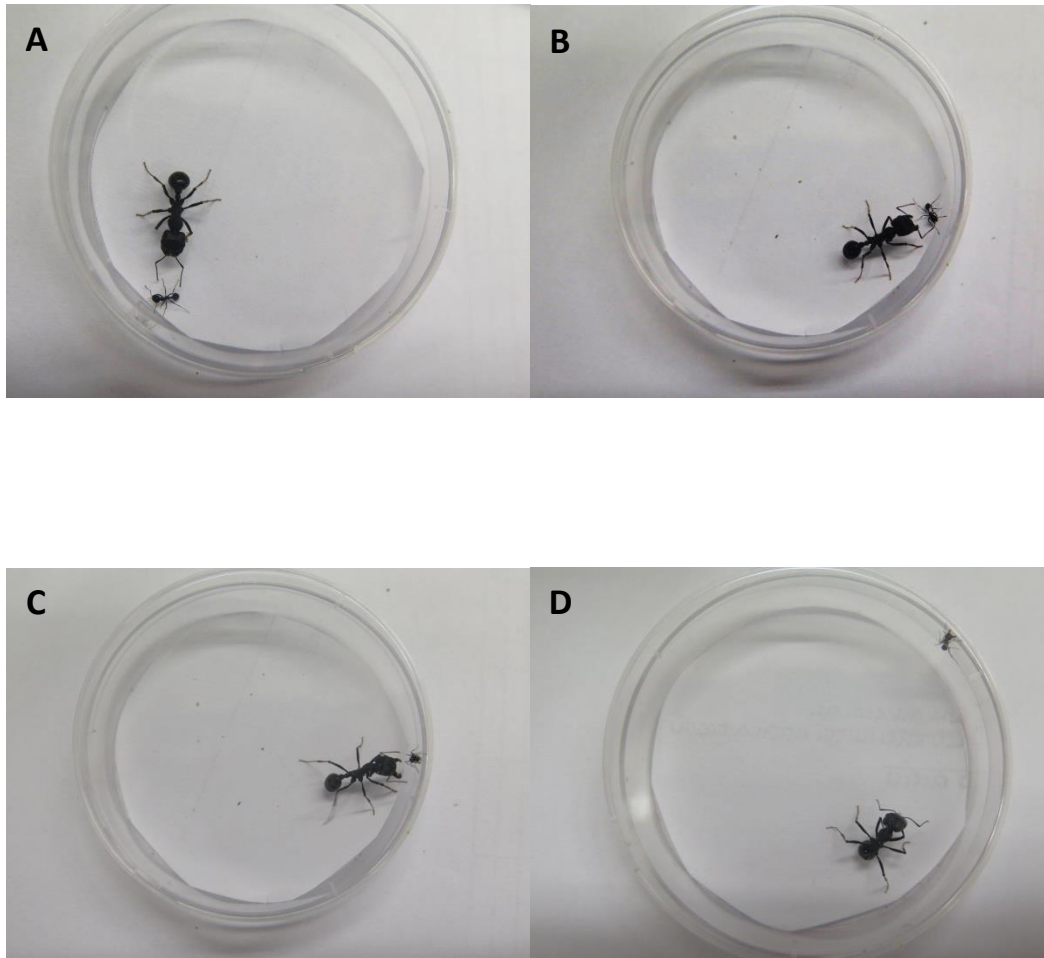

**Figure S2:** Foraging activities of the new species *M.sp.*, observed in the study site; (A) a group of foragers ‘gang’ carrying a large food item back to their colony. (B) foragers collecting *Senecio joppensis* plant material at the end of their foraging trail. (C) measuring foraging trails in the study site using a measuring tape. (D) the colony entrance and foragers leaving and returning on the vegetation - clear foraging trail:

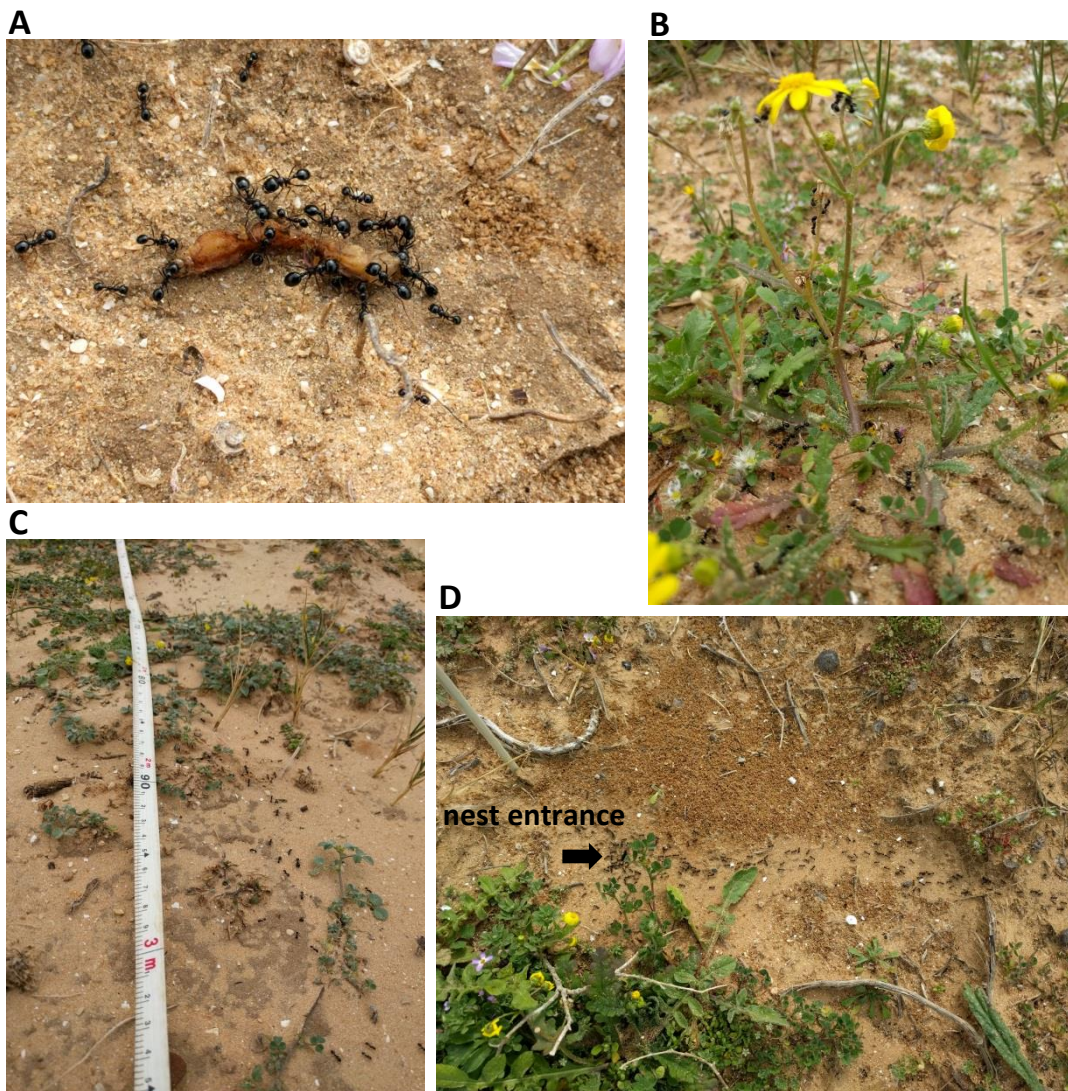

**Figure S3:** All correlations between genetic relatedness and the specific aggression levels in each studied species: Aggression towards conspecifics (A, D), towards heterospecifics (B, E) and towards nestmates (C, F). *M. arenarius*' correlations appear in grey dots (A-C) and *M. sp.*' correlations appear in black dots (D-F). The only significant correlation appears in (E): relatedness was negatively correlated with aggression towards heterospecifics in *M. sp.* All X axes present the Queller index for relatedness.

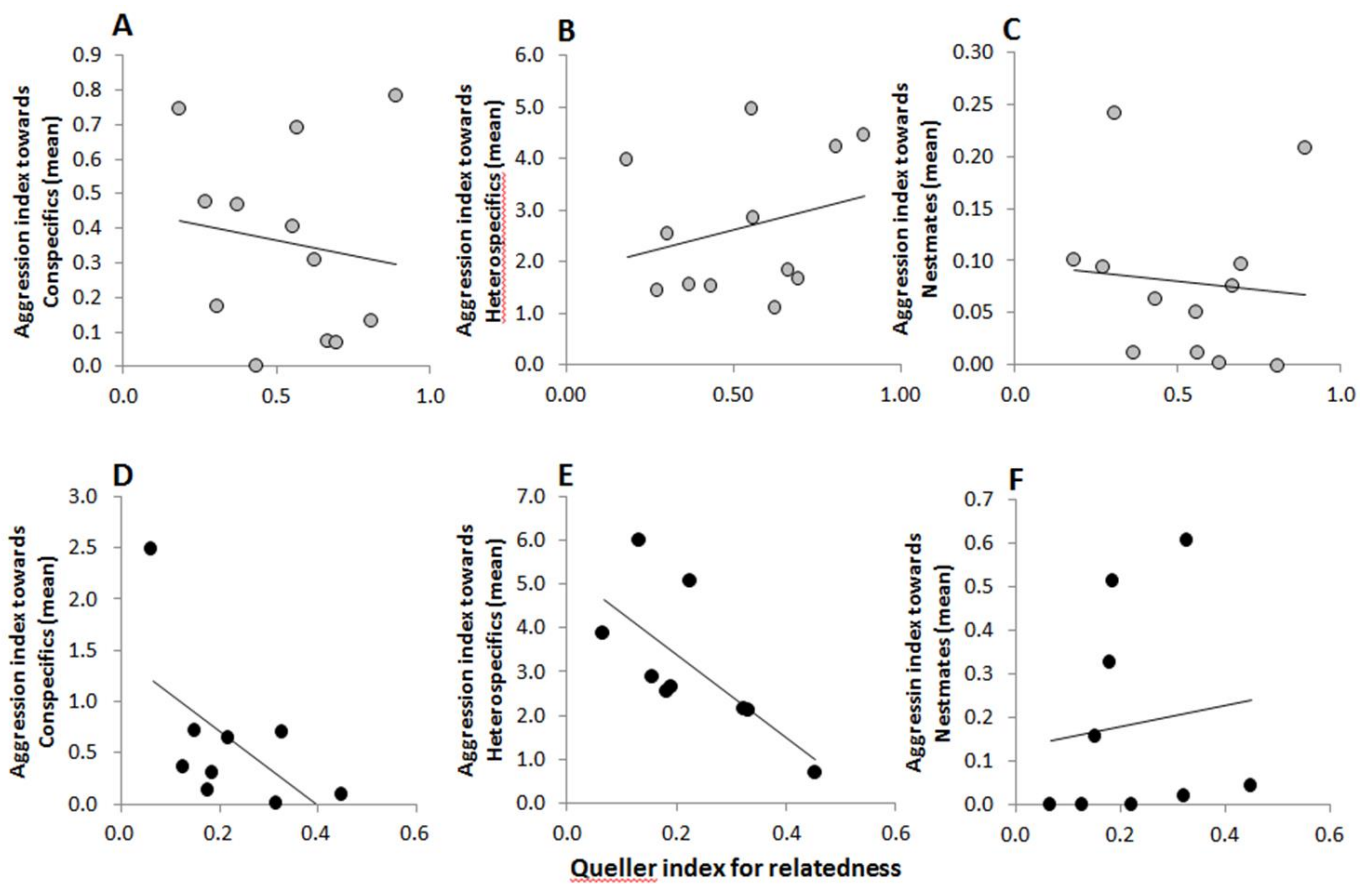

**Figure S4:** Correlations between the foraging performance (average mass of the collected seeds in both X axes) and nest maintenance (proportion of obstacles removed) for *M. arenarius* (A) in grey dots and *M. sp.* (B) in black dots. Both correlations are not significant:

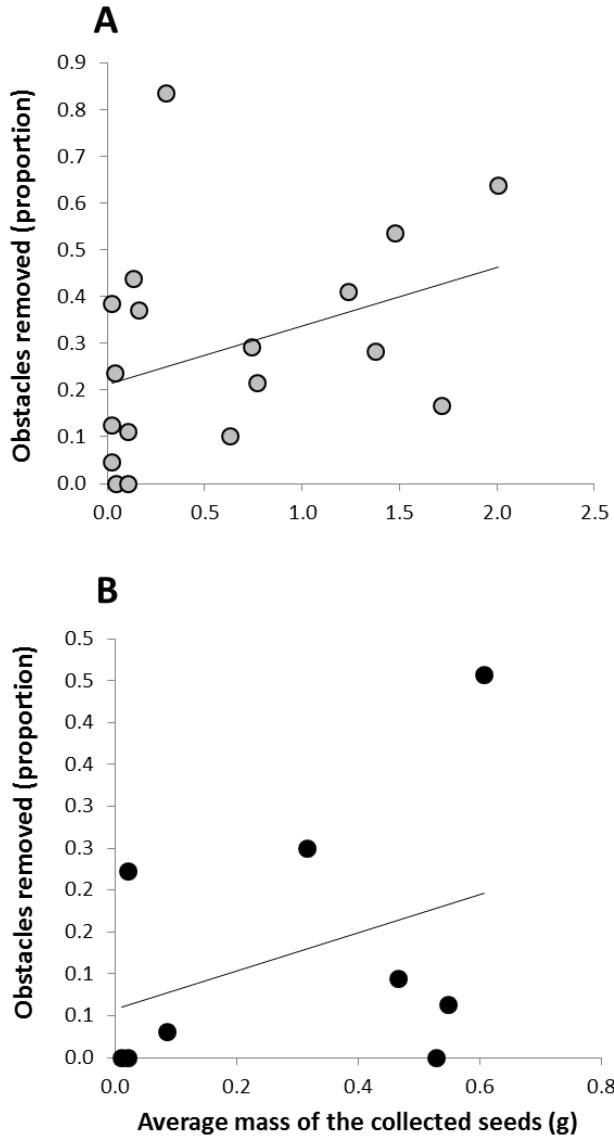



## References

- Chapuis M.P. & Estoup A. (2007). Microsatellite Null Alleles and Estimation of Population Differentiation. *Molecular Biology and Evolution*. 24, 621-631.
- Dempster A.P., Laird N.M. & Rubin D.B. (1977). Maximum likelihood from incomplete data via the EM algorithm. *Journal of the Royal Statistical Society. Series B (Methodological)*. 39, 1-38.
- Holland M.M. & Parson W. (2011). GeneMarker® HID: A Reliable Software Tool for the Analysis of Forensic STR Data. *Journal of Forensic Sciences*. 56, 29-35.
- Rousset F. (2008). Genepop'007: a complete reimplementation of the Genepop software for Windows and Linux. *Molecular Ecology Resources*. 8, 103-106.
